# Supplementary material for: Sewage Sludge Ash-Based Biofertilizers as a Circular Approach to Phosphorus: The Issue of Fe and Al in Soil and Wheat and Weed Plants
Source: MDPI journal article supplement (doi:10.3390/agronomy12061475), 2022-06-19
Supplement: s1 [file s1]

Archive with 1 entries (1 files):
- agronomy-1755604-supplementary.pdf
